# Supplementary material for: A rhomboid-shaped organic host molecule with small binding space. Unsymmetrical and symmetrical inclusion of halonium ions
Source: Royal Society of Chemistry journal article supplement (doi:10.1039/c3dt53629g), 2014-01-01
Supplement: c3dt53629g1.pdf [file c3dt53629g1.pdf]

*Supporting Information of*

**Rhomboid-shaped Organic Host Molecule with Small Binding  
Space. Unsymmetrical and Symmetrical Inclusion of  
Halonium Ions**

Yuji Suzaki, Takashi Saito, Tomohito Ide and Kohtaro Osakada\*

Chemical Resources Laboratory R1-3, Tokyo Institute of Technology

4259 Nagatsuta, Midoriku, Yokohama 226-8503, Japan.

Fax: +81-45-924-5224; Tel: +81-45-924-5224

E-mail: [kosakada@res.titech.ac.jp](mailto:kosakada@res.titech.ac.jp)

## Computational Details

Ground state geometry optimization was performed by PBE38<sup>S1</sup> density functional with TZVP (for H, C, N, Cl), LANL2TZ (for Zn, Ag) and LANL08 (for Br) basis sets. To improve computational speed, the RIJCOSX approximation in combination with TZV/J auxiliary basis set was applied. The computational method describe above denotes RIJCOSX-PBE38/TZVP in SI, but all PBE38/TZVP (and combination with LANL2TZ/LANL08) computation using approximation was denoted PBE38/TZVP due to simplify in the text. The PBE38 functional that includes 3/8 = 37.5% Hartree–Fock exact exchange was chosen by results of preliminary calculations (Figure S1). TD-DFT vertical excitation energy was obtained by RIJCOSX-PBE38/TZVP with Tamm–Dancoff approximation (it denotes TDA-RIJCOSX-PBE38/TZVP). TD-DFT excited state geometry optimization was carried out by TDA-RIJCOSX-PBE38/TZVP level of theory. Stationary points of both ground and excited state were characterized by Hessian calculation. Potential energy curve was obtained by relax potential energy surface scan calculation that N–N distance is constrained at RIJCOSX-PBE38/TZVP level of theory. Excitation and fluorescent wavelength in solution were also consider single point TDA-RIJCOSX-PBE38/TZVP calculation with COSMO solvation model. All calculations were performed by ORCA 2.9.1<sup>S2</sup>. The plots (isosurface = 0.02) of the frontier orbitals were drawn by VESTA 3.1.4<sup>S3</sup>.

## References

- (S1) Grimme, J. Antony, S. Ehrlich and H. Krieg, *J. Chem. Phys.* **2010**, *132*, 154104.
- (S2) F. Neese, *WIREs Comput. Mol. Sci.* **2012**, *2*, 73.
- (S3) K. Momma and F. Izumi, *J. Appl. Crystallogr.* **2011**, *44*, 1272.
- (S4) F. Neese, A. Hansen and D. G. Liakos, *J. Chem. Phys.* **2009**, *131*, 064103.

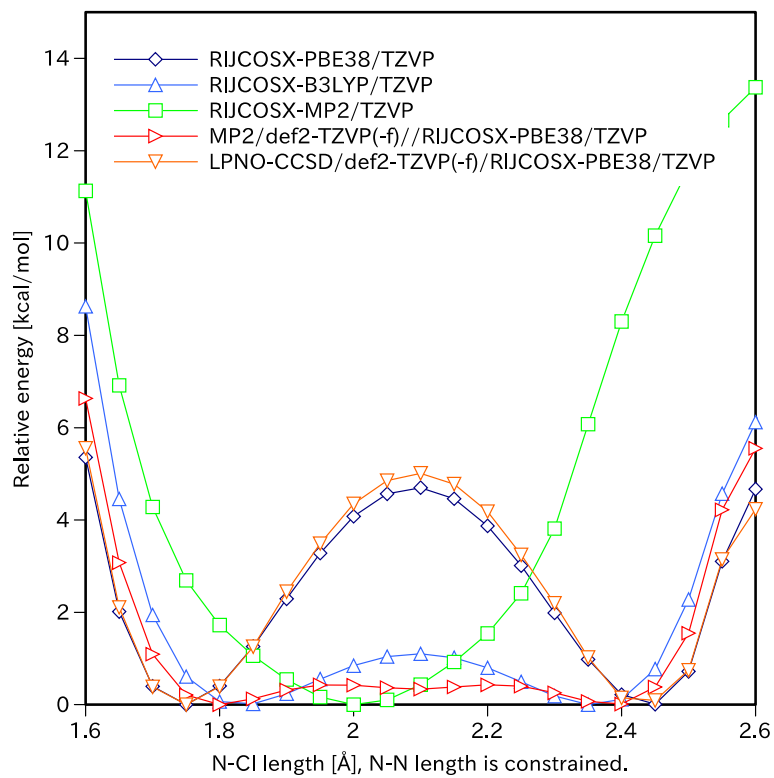

Figure S1. Potential energy curves (N-Cl length) of selected preliminary calculation methods. RIJCOSX-PBE38/TZVP affords comparable result to the most accurate method in the preliminary calculations, LPNO-CCSD<sup>S4</sup>/def2-TZVP(-f)//RIJCOSX-PBE38/TZVP.

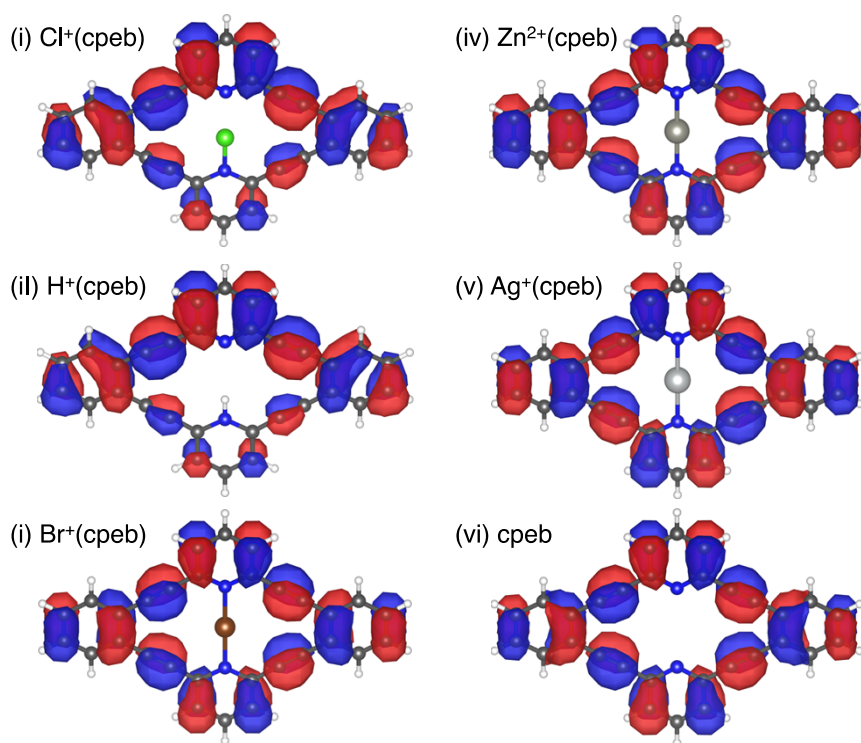

Figure S2. Calculated HOMO (highest occupied molecular orbital) of (i)  $\text{Cl}^+(\text{cpeb})$ , (ii)  $\text{H}^+(\text{cpeb})$ , (iii)  $\text{Br}^+(\text{cpeb})$ , (iv)  $\text{Zn}^{2+}(\text{cpeb})$ , (v)  $\text{Ag}^+(\text{cpeb})$  and (vi)  $\text{cpeb}$ .

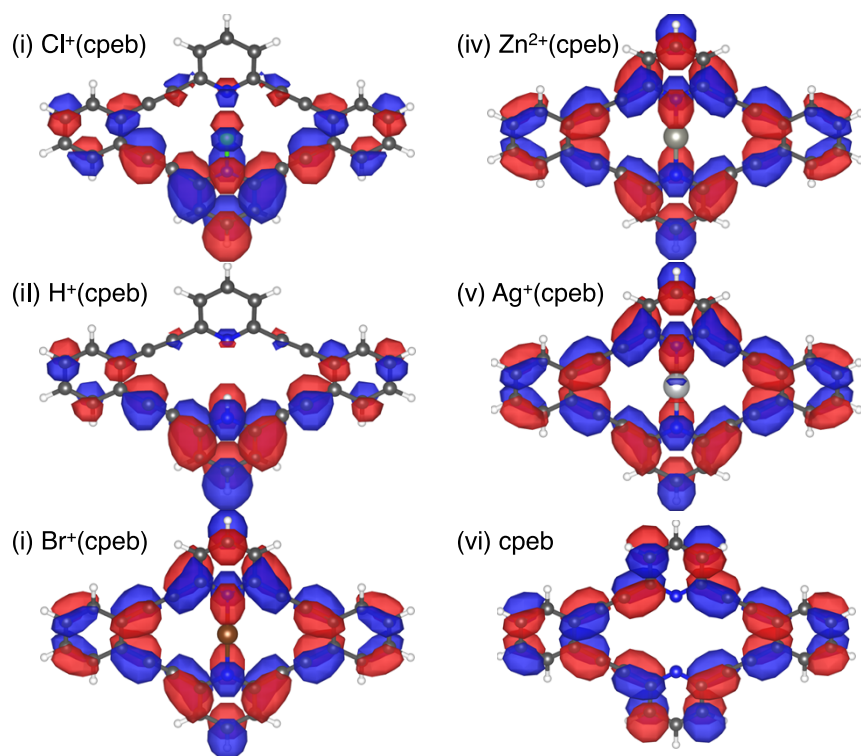

Figure S3. Calculated LUMO (lowest unoccupied molecular orbital) of (i)  $\text{Cl}^+(\text{cpeb})$ , (ii)  $\text{H}^+(\text{cpeb})$ , (iii)  $\text{Br}^+(\text{cpeb})$ , (iv)  $\text{Zn}^{2+}(\text{cpeb})$ , (v)  $\text{Ag}^+(\text{cpeb})$  and (vi)  $\text{cpeb}$ .

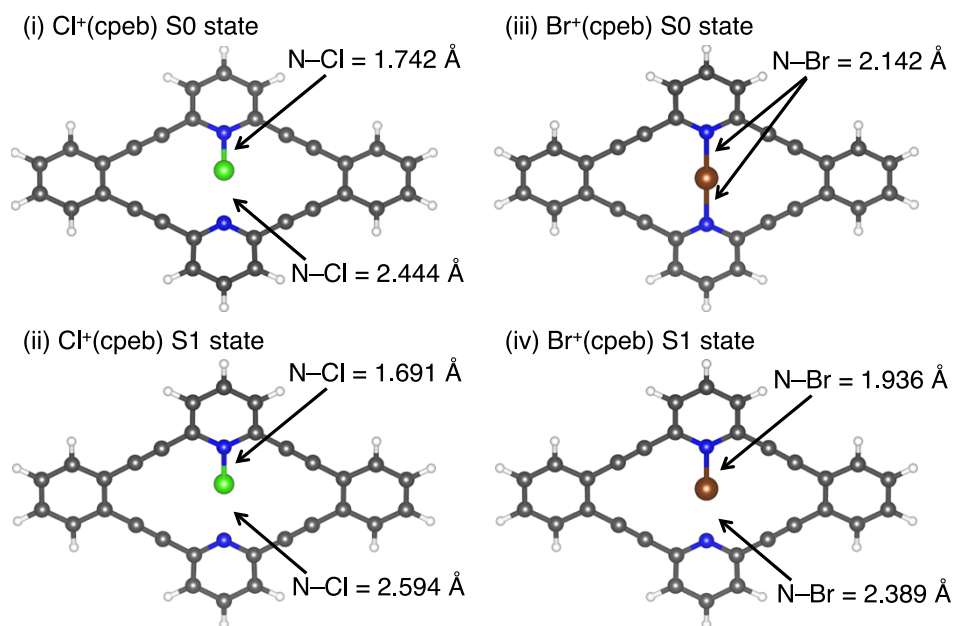

Figure S4. N-X (X = Cl<sup>+</sup>, Br<sup>+</sup>) length of (i) Cl<sup>+</sup>(cpeb) S0 state, (ii) Br<sup>+</sup>(cpeb) S0 state, (iii) Cl<sup>+</sup>(cpeb) S1 state and (iv) Br<sup>+</sup>(cpeb) S1 state.

Table S1. Calculated absorption wavelength of the compounds in gas phase.

|                         | S1/nm | <i>f</i> (S1) | S2/nm | <i>f</i> (S2) | S3/nm | <i>f</i> (S3) |
|-------------------------|-------|---------------|-------|---------------|-------|---------------|
| cepb                    | 340.0 | 0.0000        | 304.7 | 0.8850        | 285.8 | 0.0000        |
| H <sup>+</sup> (cpeb)   | 464.7 | 0.0632        | 356.7 | 0.3218        | 353.0 | 0.5103        |
| Cl <sup>+</sup> (cpeb)  | 440.4 | 0.0579        | 347.6 | 0.3126        | 342.0 | 0.5265        |
| Ag <sup>+</sup> (cpeb)  | 367.9 | 0.0000        | 307.4 | 0.8061        | 304.2 | 0.6563        |
| Br <sup>+</sup> (cpeb)  | 392.0 | 0.0000        | 323.0 | 0.4666        | 309.6 | 0.7807        |
| Zn <sup>2+</sup> (cpeb) | 424.1 | 0.0000        | 378.2 | 0.0000        | 351.3 | 0.4494        |

Table S2. Calculated absorption wavelength of the compounds in CH<sub>2</sub>Cl<sub>2</sub> (gas phase geometry).

|                         | S1/nm | <i>f</i> (S1) | S2/nm | <i>f</i> (S2) | S3/nm | <i>f</i> (S3) |
|-------------------------|-------|---------------|-------|---------------|-------|---------------|
| cepb                    | 342.5 | 0.0000        | 301.8 | 0.8822        | 282.9 | 0.3410        |
| H <sup>+</sup> (cpeb)   | 436.2 | 0.0788        | 342.2 | 0.4629        | 345.0 | 0.4770        |
| Cl <sup>+</sup> (cpeb)  | 429.9 | 0.0627        | 339.0 | 0.5390        | 342.3 | 0.3928        |
| Ag <sup>+</sup> (cpeb)  | 365.3 | 0.0000        | 304.8 | 0.8031        | 300.9 | 0.5332        |
| Br <sup>+</sup> (cpeb)  | 388.4 | 0.0000        | 319.0 | 0.4677        | 308.2 | 0.7538        |
| Zn <sup>2+</sup> (cpeb) | 407.6 | 0.0000        | 332.2 | 0.3906        | 345.3 | 0.0000        |

Table S3. Calculated fluorescent wavelength of the compounds in gas phase.

|                         | S0←S1/nm | $f(S0←S1)$ |
|-------------------------|----------|------------|
| cepb                    | 378.0    | 0.0000     |
| H <sup>+</sup> (cpeb)   | 521.2    | 0.0371     |
| Cl <sup>+</sup> (cpeb)  | 504.1    | 0.3646     |
| Ag <sup>+</sup> (cpeb)  | 411.8    | 0.0000     |
| Br <sup>+</sup> (cpeb)  | 457.7    | 0.0282     |
| Zn <sup>2+</sup> (cpeb) | 481.3    | 0.0000     |

Table S4. Calculated fluorescent wavelength of the compounds in CH<sub>2</sub>Cl<sub>2</sub> (gas phase geometry).

|                         | S0←S1/nm | $f(S0←S1)$ |
|-------------------------|----------|------------|
| cepb                    | 382.1    | 0.0000     |
| H <sup>+</sup> (cpeb)   | 489.3    | 0.0000     |
| Cl <sup>+</sup> (cpeb)  | 491.5    | 0.0394     |
| Ag <sup>+</sup> (cpeb)  | 409.9    | 0.0000     |
| Br <sup>+</sup> (cpeb)  | 453.3    | 0.0254     |
| Zn <sup>2+</sup> (cpeb) | 463.6    | 0.0000     |

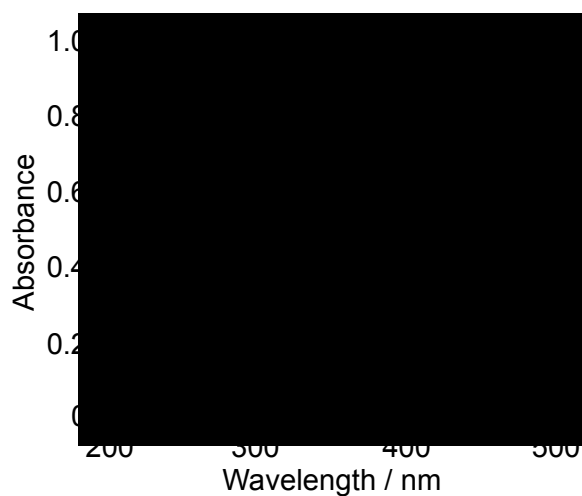

Figure S5. UV-spectra of Ag(cpeb)OTf (r.t.,  $1.0 \times 10^{-2}$  mM, generated in situ by reaction of cpeb and AgOTf in  $\text{CH}_2\text{Cl}_2$  (10 mL)) before and after addition of  $\text{Cl}_2$ .  $\text{Cl}_2$  gas, used in the measurement was generated by mixing 1 M HCl(aq) (10 mL) and 1 M NaOCl (5.0 mL)

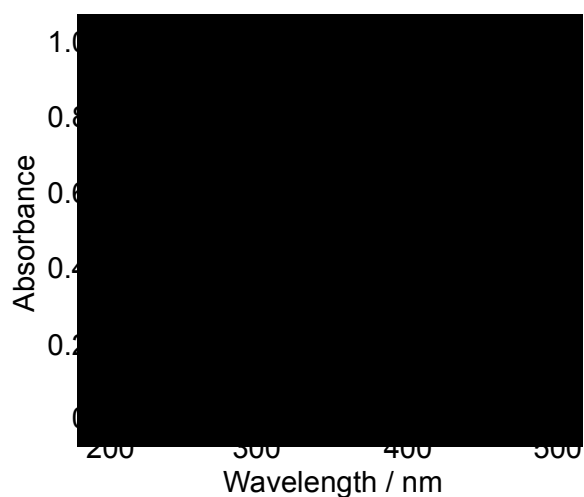

Figure S6. Change in UV-vis spectra of Ag(cpeb)OTf ( $\text{CH}_2\text{Cl}_2$ , r.t.,  $1.0 \times 10^{-2}$  mM, generated in situ by reaction of cpeb and AgOTf) by addition of  $\text{Br}_2$  ( $\sim 2.0 \times 10^{-2}$  mM).

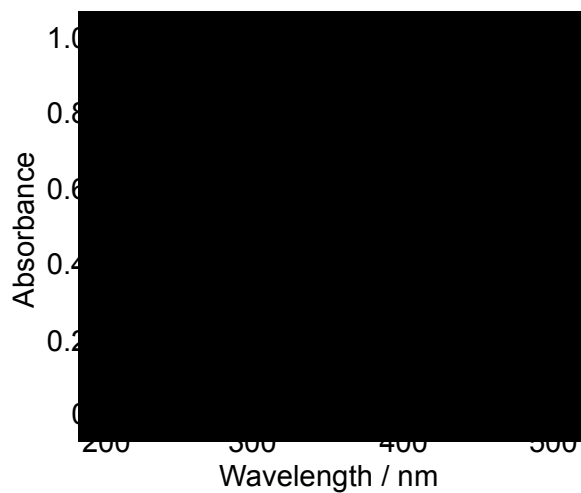

Figure S7. Change in UV-vis spectra of cpeb ( $\text{CH}_2\text{Cl}_2$ , r.t.,  $1.0 \times 10^{-2}$  mM) by addition of AgOTf ( $\sim 2.0 \times 10^{-2}$  mM).

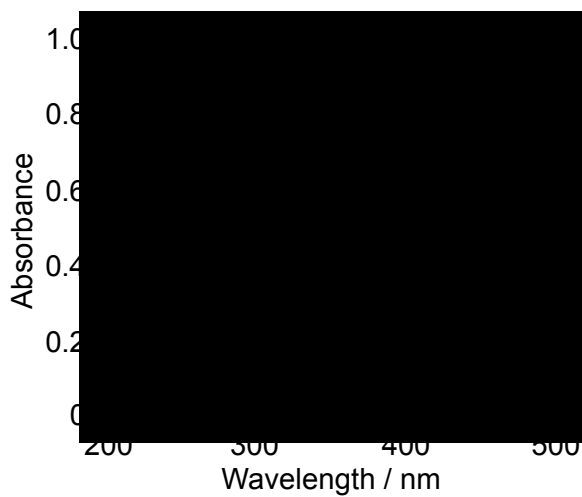

Figure S8. Change in UV-vis spectra of cpeb ( $\text{CH}_2\text{Cl}_2$ , r.t.,  $1.0 \times 10^{-2}$  mM) by addition of  $\text{Pd}(\text{OCOCF}_3)_2$  ( $\sim 4.0 \times 10^{-2}$  mM).



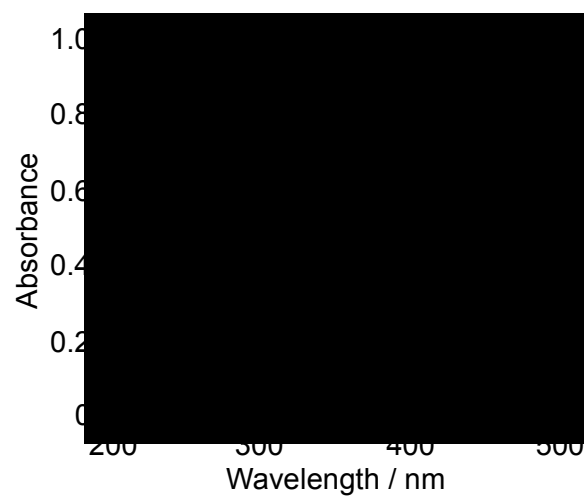

Figure S9. Change in UV-vis spectra of cpeb ( $\text{CH}_2\text{Cl}_2$ , r.t.,  $1.0 \times 10^{-2}$  mM) by addition of  $\text{Zn}(\text{OTf})_2$  ( $\sim 2.0 \times 10^{-2}$  mM).

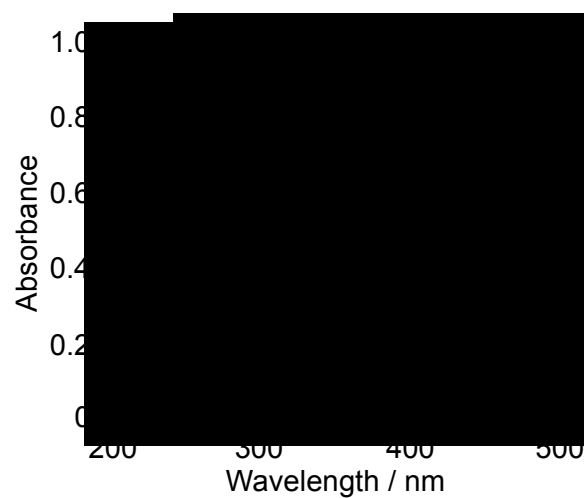

Figure S10. Change in UV-vis spectra of cpeb ( $\text{CH}_2\text{Cl}_2$ , r.t.,  $1.0 \times 10^{-2}$  mM) by addition of TFA ( $\sim 10$  mM).

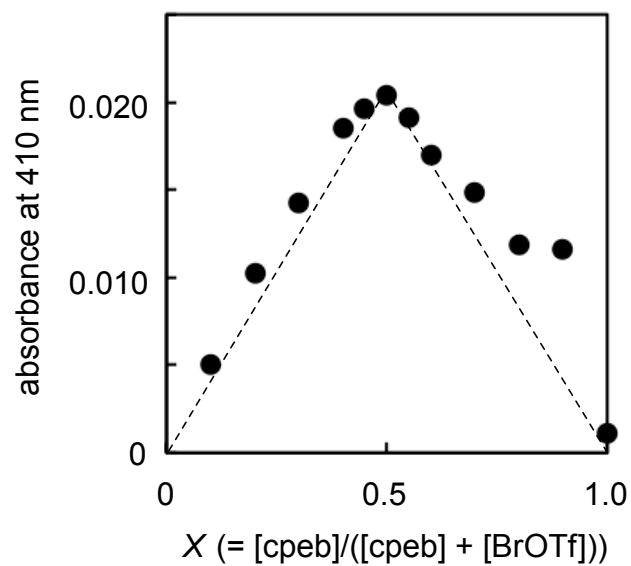

Figure S11. Job's plot of Br(cpeb)OTf obtained from absorption spectra ( $\text{CH}_2\text{Cl}_2$ , 25 °C,  $\lambda_{\text{abs}} = 410 \text{ nm}$ ,  $[\text{cpeb}] + [\text{BrOTf}] = 1.0 \times 10^{-2} \text{ mM}$ ).

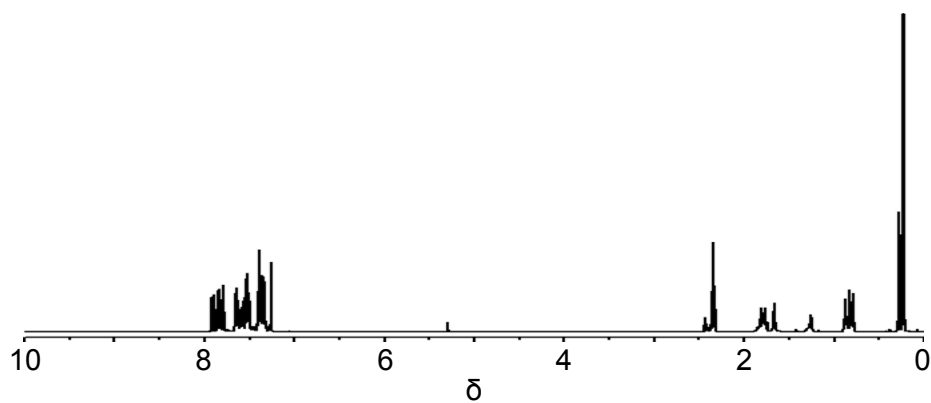

Figure S12.  $^1\text{H}$  NMR spectrum of **3** ( $\text{CDCl}_3$ , 300 MHz, r.t.)

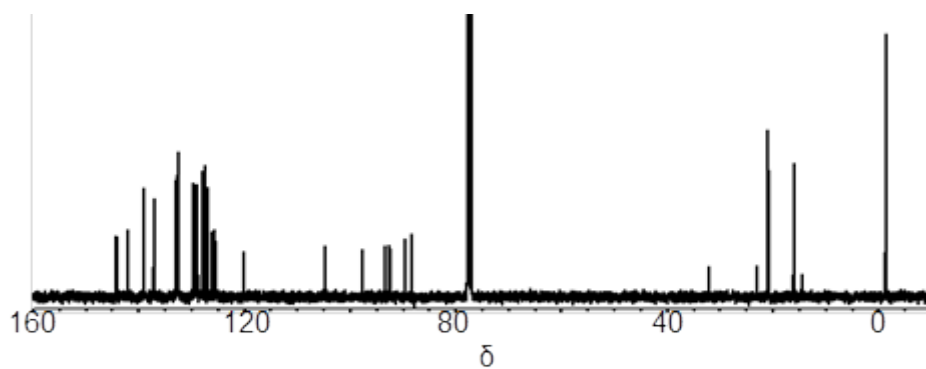

Figure S13.  $^{13}\text{C}\{^1\text{H}\}$  NMR spectrum of **3** ( $\text{CDCl}_3$ , 100 MHz, r.t.)

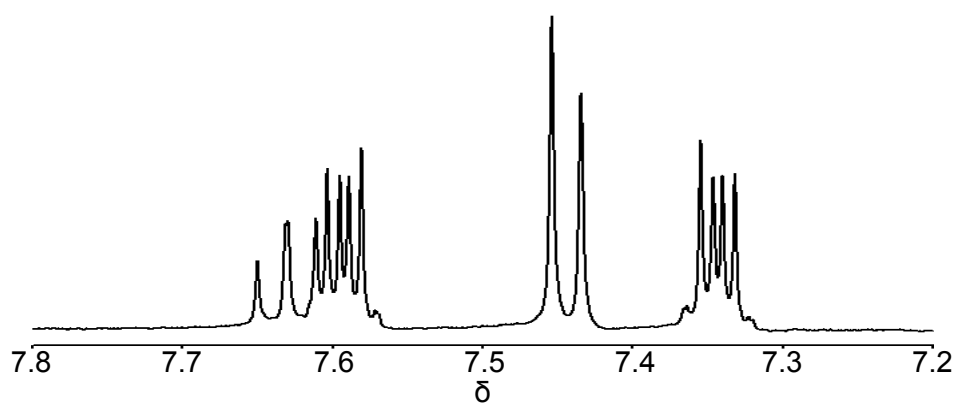

Figure S14.  $^1\text{H}$  NMR spectrum of cpeb ( $\text{CD}_2\text{Cl}_2$ , 300 MHz, r.t.)

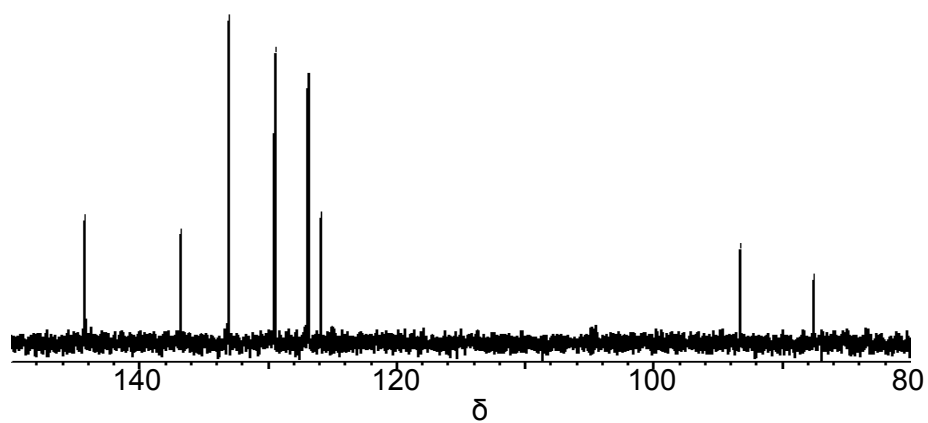

Figure S15.  $^{13}\text{C}\{^1\text{H}\}$  NMR spectrum of cpeb ( $\text{CD}_2\text{Cl}_2$ , 100 MHz, r.t.)
